# Supplementary material
Source: publisher figshare collection journal article supplement (https://gsapubs.figshare.com/ndownloader/files/23296133)
Supplement: Supplementary file 1 [file 23296133]

## Methods

All samples were ground to < 200 mesh size with a ceramic mortar and pestle, acidified with a 1 N HCl solution to remove carbonates, washed to neutrality, and dried at 50° C. The carbonate-free residues were weighed into tin capsules and converted to CO<sub>2</sub> and N<sub>2</sub> for isotope analysis using a Carlo Erba elemental analyzer (EA) coupled to an Optima stable isotope ratio mass spectrometer (Micromass, Manchester, UK). Carbon and nitrogen isotope compositions were determined on gases from a single combustion using a dual furnace system composed of an oxidation furnace at 1020°C and a reduction furnace at 650°C. Sulfur isotope compositions were determined on gases using a single oxidation/reduction furnace at 1030°C. The resulting gases were chemically dried and directly injected into the source of the mass spectrometer. Isotope results are reported in per mil (‰) notation as follows:

$$\delta^X E = [R_{\text{sample}}/R_{\text{standard}} - 1] 1000 (\text{‰})$$

where X is the heavy isotope of the element E and R is the abundance ratio of the heavy to light isotopes (<sup>13</sup>C/<sup>12</sup>C, <sup>15</sup>N/<sup>14</sup>N or <sup>34</sup>S/<sup>32</sup>S) of that element. The standard for carbon is the Peedee Belemnite limestone (PDB), for nitrogen the standard is atmospheric N<sub>2</sub> (Air) and for sulfur the standard is Canyon Diablo Troilite (CDT). Standards are assigned δ<sup>X</sup>E values of 0.0‰. For sulfur and carbon the value is corrected for the mass overlap with the isotopes of oxygen. The reproducibility of the measurement is typically better than ±0.2‰ for these elements using the continuous flow interface on the Optima. In the laboratory, the samples are commonly measured against tanks of carbon dioxide, nitrogen, and sulfur dioxide gases that have been calibrated against NBS 22, atmospheric N<sub>2</sub> and NBS 127, respectively. Reproducibility between duplicate standards for %C<sub>org</sub>, %N<sub>total</sub>, and %S<sub>total</sub> averaged ± 2% of the abundance.

Total phosphorus (TP) was determined using the combustion method (Aspila et al. 1976). A 0.5 g aliquot of each sample was combusted at 550°C for two hours, allowed to cool, and shaken overnight in a water bath in a 1 N HCl solution. The P content of the decanted solution was determined spectrophotometrically. The reproducibility for replicate samples and standards was ± 3.5% of the measured abundance.

The total sulfur content of samples was determined using a Carlo Erba elemental analyzer (EA). All sulfur was assumed to be in the form of reduced sulfides, primarily pyrite. The degree of pyritization (DOP) was determined by the ratio

$$\text{DOP} = \text{Fe}_{\text{pyr}}/(\text{Fe}_{\text{pyr}} + \text{Fe}_x)$$

where Fe<sub>x</sub> represents the weight percent reactive iron and Fe<sub>pyr</sub> represents the weight percent of pyrite-bound Fe (Raiswell et al. 1988). Pyrite-bound Fe was determined from the total pyrite-bound S based on the 1:2 stoichiometry of FeS<sub>2</sub> (weight percent S × 0.871). Reactive Fe was determined by washing 0.1 g of sample in 5 ml of 1N HCl for

24 hours (Leventhal & Taylor 1990). A 10 µl aliquot of supernatant was mixed with 4 ml of FerroZine reagent and the Fe concentration was determined spectrophotometrically at a wavelength of 562 nm.

## References

Aspila, K.I., Agemian, H. & Chau, A.S.Y., 1976, A Semi-automated Method for the Determination of Inorganic, Organic and Total Phosphate in Sediments, *Analyst*, 101, pp. 187-97.

Leventhal, J. & Taylor, C., 1990, Comparison Of Methods To Determine Degree Of Pyritization, *Geochimica et Cosmochimica Acta*, 54(9), pp. 2621-5.

Over, D.J., 2002, The Frasnian/Famennian boundary in central and eastern United States, *Palaeogeography Palaeoclimatology Palaeoecology*, 181(1-3), pp. 153-69.

Raiswell, R., Buckley, F., Berner, R.A. & Anderson, T.F., 1988, Degree Of Pyritization Of Iron As A Paleoenvironmental Indicator Of Bottom-Water Oxygenation, *Journal of Sedimentary Petrology*, 58(5), pp. 812-9.

## Supplemental Figure Captions

Figure DR1. Stratigraphy of the Upper Kellwasser (UKw) interval at three sites in the Hanover Shale Member of the Java Formation of western New York. The top of the UKw interval marks the Frasnian/Famennian boundary, defined by the appearance of the Famennian conodont *Palmatolepis triangularis* (Over 2002). At all three sites the interval consists of laminated black shales, with the exception of a silty layer at Irish Gulf, bounded by bioturbated gray/green shales.

Figure DR2. Crossplot of normalized section thickness and mean total phosphorus (TP) abundance versus relative offshore distance. The thickness of the UKw interval diminishes exponentially with increasing distance from the shoreline and the clastic sediment source. As a terrestrial mineral weathering product, the flux of P also declines in an exponential manner.

Figure DR1

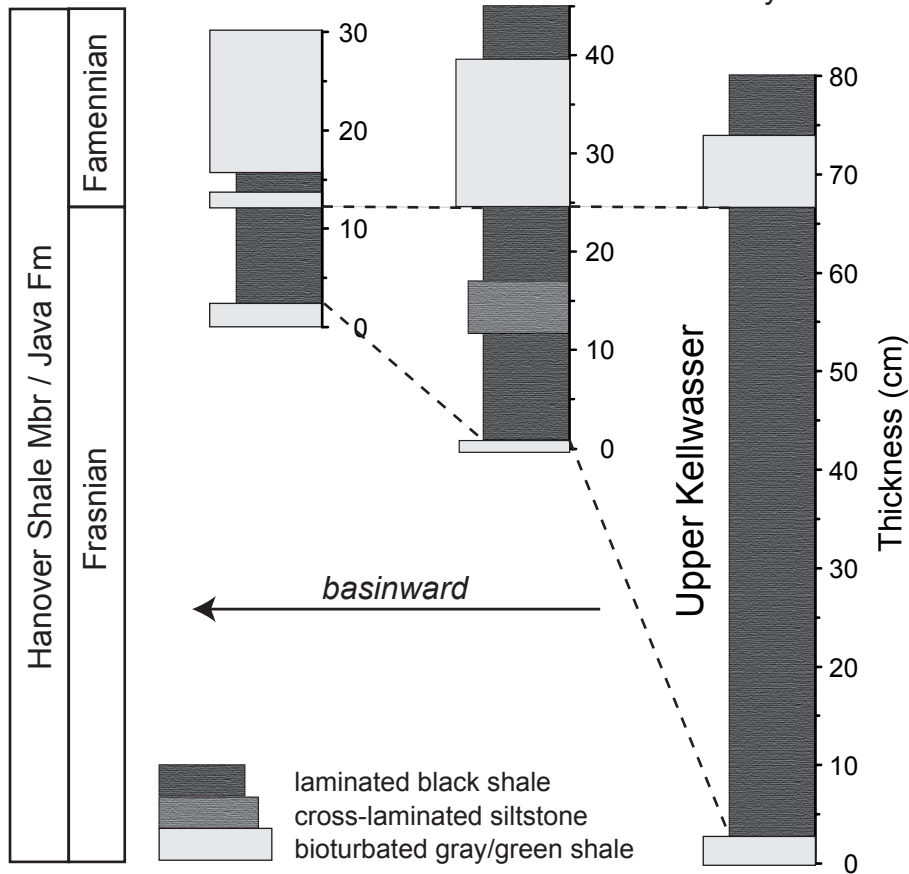

Figure DR2

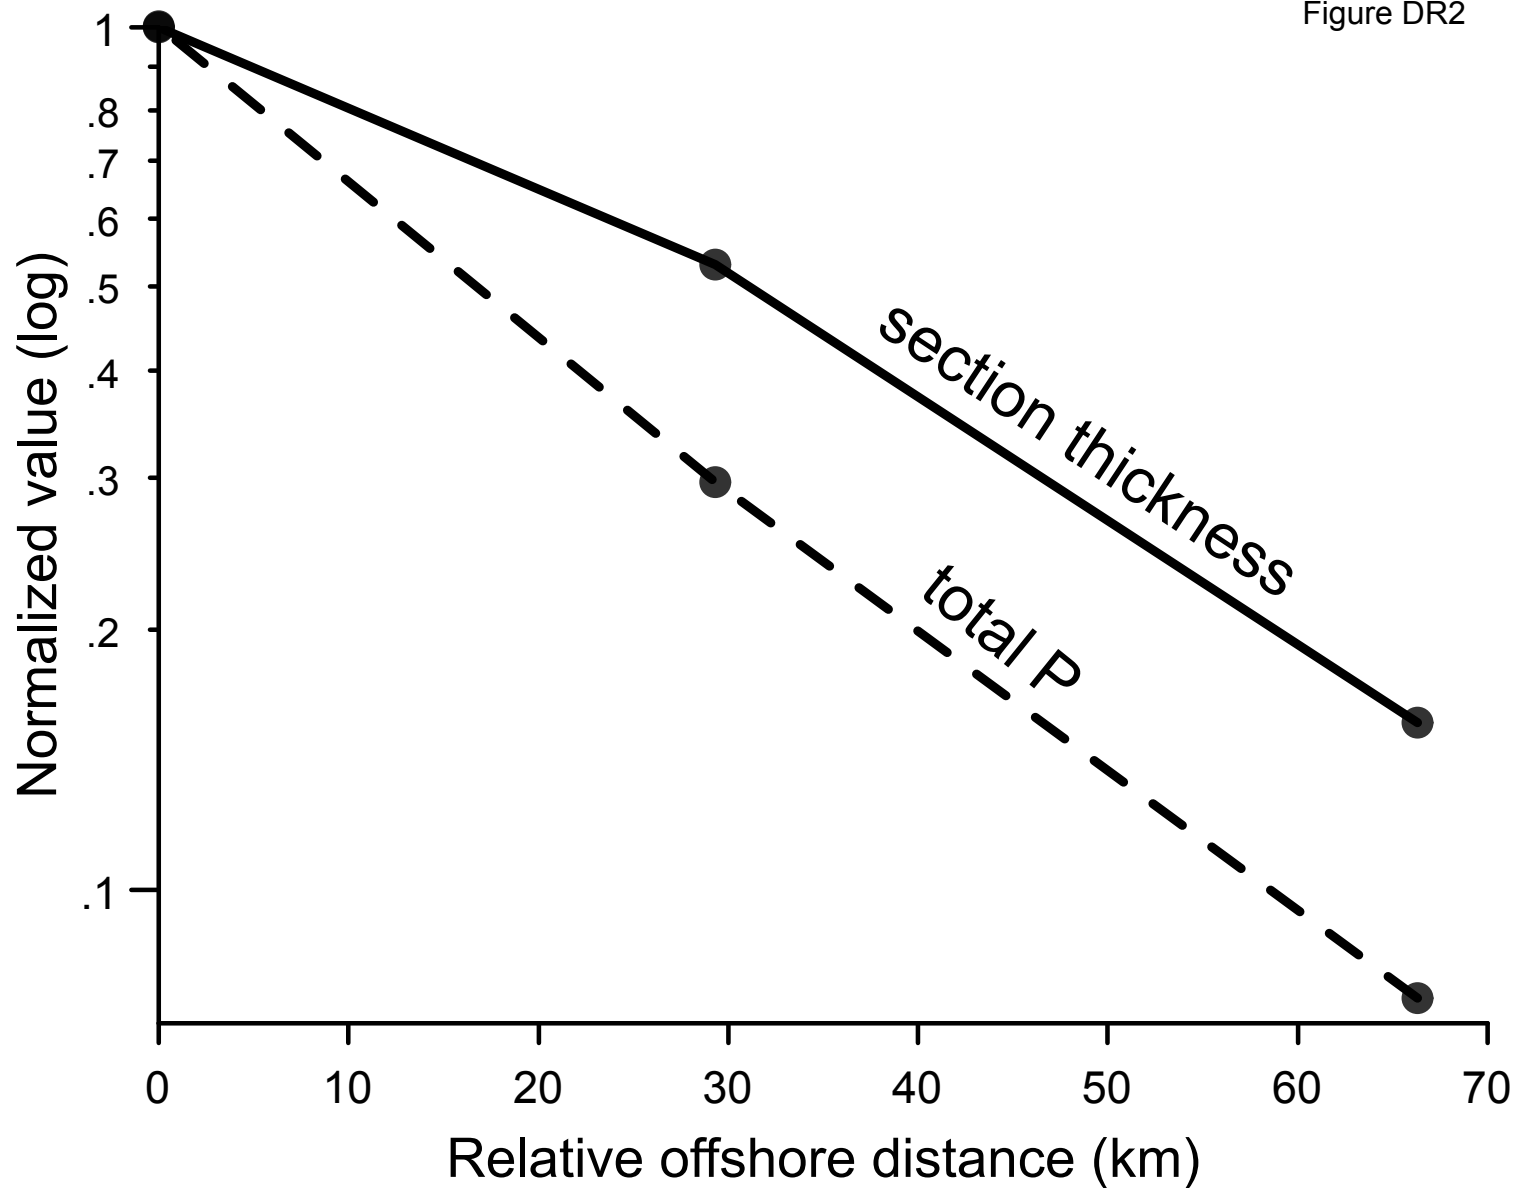

Table DR1

| Perry Farm |                |      |      |       |                          |                            |                           |         |        |      |     |
|------------|----------------|------|------|-------|--------------------------|----------------------------|---------------------------|---------|--------|------|-----|
| Sample     | Thickness (cm) | TOC  | TN   | TP    | $\delta^{15}\text{Corg}$ | $\delta^{15}\text{Ntotal}$ | $\delta^{34}\text{Sbulk}$ | TOC/TN  | TOC/TP | DOP  |     |
|            |                |      |      |       |                          |                            |                           | (molar) | (mol)  |      |     |
| PF01       | 1.5            | 0.83 | 0.09 | 0.038 | -28                      | 1.8                        | -24.7                     | 11      | 56     | 0.75 |     |
| PF02       | 4.5            | 1.49 | 0.11 | 0.038 | -29                      | 0.6                        | -25.9                     | 16.1    | 102    | 0.74 | Ukw |
| PF03       | 7.5            | 1.96 | 0.11 | n/d   | -28.5                    | -0.1                       | -27.1                     | 20.6    | n/d    | n/d  | Ukw |
| PF04       | 16             | 2.71 | 0.14 | 0.04  | -28.9                    | -0.3                       | -25.8                     | 23.1    | 176    | 0.76 | Ukw |
| PF05       | 18.5           | 2.49 | 0.12 | 0.04  | -28.4                    | -0.6                       | -25.1                     | 24.6    | 159    | 0.79 | Ukw |
| PF06       | 21             | 2.52 | n/d  | 0.042 | -28.8                    | -0.1                       | -24.6                     |         | 156    | 0.78 | Ukw |
| PF07       | 23             | 1.96 | 0.1  | 0.049 | -29.8                    | 0.2                        | -24.4                     | 23.1    | 104    | 0.78 | Ukw |
| PF08       | 25             | 2.4  | 0.13 | 0.039 | -28.8                    | -0.1                       | -24.5                     | 21.2    | 158    | 0.79 | Ukw |
| PF09       | 27             | 2.32 | 0.12 | 0.038 | -28.7                    | -0.7                       | -25                       | 22.5    | 159    | 0.79 | Ukw |
| PF10       | 29             | 2.73 | 0.13 | 0.039 | -28.7                    | -0.6                       | -24.4                     | 24.5    | 181    | 0.79 | Ukw |
| PF11       | 31             | 2.44 | 0.13 | 0.041 | -28.5                    | -0.4                       | -22.8                     | 22      | 155    | 0.79 | Ukw |
| PF12       | 33             | 2.42 | 0.13 | 0.036 | -28.7                    | -0.4                       | -24.2                     | 21.7    | 172    | 0.79 | Ukw |
| PF13       | 35             | 2.72 | 0.13 | 0.041 | -28.6                    | -0.7                       | -24                       | 24.8    | 172    | 0.81 | Ukw |
| PF14       | 37             | 3.02 | 0.14 | 0.043 | -28.5                    | -0.8                       | -24.6                     | 26.1    | 179    | 0.8  | Ukw |
| PF15       | 41             | 2.41 | 0.12 | 0.054 | -27.8                    | -0.9                       | -26.3                     | 24.2    | 115    | 0.8  | Ukw |
| PF16       | 43             | 2.64 | 0.13 | 0.056 | -27.8                    | -0.8                       | -23.9                     | 24.2    | 121    | 0.83 | Ukw |
| PF17       | 45             | 3.73 | 0.15 | 0.051 | -26.7                    | -0.2                       | -23.9                     | 28.3    | 188    | 0.78 | Ukw |
| PF18       | 47             | 3.46 | 0.18 | 0.055 | -27.2                    | 0.1                        | -23.9                     | 22.8    | 162    | 0.83 | Ukw |
| PF19       | 49.5           | 3.04 | 0.15 | 0.051 | -25.7                    | 0                          | -17.8                     | 23.9    | 153    | 0.85 | Ukw |
| PF20       | 52.5           | 2.63 | 0.13 | 0.052 | -26.2                    | -0.2                       | -19.7                     | 23.1    | 132    | 0.84 | Ukw |
| PF21       | 55             | 2.17 | 0.12 | 0.045 | -25.7                    | 1.3                        | -18.4                     | 20.9    | 125    | 0.81 | Ukw |
| PF22       | 59             | 1.94 | 0.11 | 0.046 | -25.6                    | -0.1                       | -21.9                     | 20.8    | 109    | 0.85 | Ukw |
| PF23       | 61             | 2.35 | 0.11 | 0.044 | -26                      | -0.1                       | -27.5                     | 25      | 137    | 0.79 | Ukw |
| PF24       | 63             | 2.82 | 0.14 | 0.04  | -26.4                    | -0.6                       | -27.3                     | 24.4    | 182    | 0.79 | Ukw |
| PF25       | 65             | 2.51 | n/d  | 0.041 | -26.4                    | 0.2                        | -27.6                     | n/d     | 159    | 0.83 | Ukw |
| PF26       | 68.5           | 0.39 | 0.07 | 0.044 | -23.8                    | 1.1                        | -25.7                     | 6.8     | 23     | 0.78 |     |

| Irish Gulf |             |      |      |       |         |           |          |         |         |      |     |
|------------|-------------|------|------|-------|---------|-----------|----------|---------|---------|------|-----|
| Sample     | Height (cm) | TOC  | TN   | TP    | d13Corg | d15Ntotal | d34Sbulk | TOC/TN  | TOC/TP  | DOP  |     |
|            |             |      |      |       |         |           |          | (molar) | (molar) |      |     |
| IG03       | 0           | 0.39 | 0.09 | 0.026 | -28.9   | 0.3       | -28.1    | 5.1     | 38      | 0.69 |     |
| IG05       | 1.5         | 3.84 | 0.15 | 0.031 | -29.1   | -0.6      | -21.9    | 29.5    | 321     | 0.8  | Ukw |
| IG06       | 3.5         | 2.2  | 0.12 | 0.033 | -29.3   | -0.1      | -29.5    | 20.9    | 173     | 0.77 | Ukw |
| IG07       | 5.5         | 2.79 | 0.14 | 0.034 | -29.6   | -0.3      | -29.7    | 22.6    | 213     | 0.8  | Ukw |
| IG08       | 7.5         | 3.51 | 0.17 | 0.035 | -29.4   | 0.2       | -24.9    | 24.7    | 261     | 0.75 | Ukw |
| IG09       | 9.5         | 3.56 | 0.16 | 0.037 | -29.8   | -0.6      | -27.1    | 25.8    | 250     | 0.81 | Ukw |
| IG10       | 11.5        | 1.18 | 0.09 | 0.037 | -28.7   | 0         | -19.8    | 15.8    | 83      | 0.71 | Ukw |
| IG11       | 13.5        | 1.38 | 0.09 | 0.036 | -28.5   | 0.3       | -25.3    | 17.6    | 99      | 0.69 | Ukw |
| IG12       | 15.5        | 1.66 | 0.11 | 0.036 | -28.5   | 0.5       | -23.5    | 17      | 120     | 0.7  | Ukw |
| IG13       | 21.5        | 3.17 | 0.16 | 0.037 | -29.3   | -0.3      | -25.5    | 23.7    | 222     | 0.79 | Ukw |
| IG14       | 27.5        | 0.3  | 0.11 | 0.034 | -23.9   | 1         | -23.2    | 3.3     | 23      | 0.4  |     |

| Walnut Creek |             |      |      |       |         |           |          |         |         |      |     |
|--------------|-------------|------|------|-------|---------|-----------|----------|---------|---------|------|-----|
| Sample       | Height (cm) | TOC  | TN   | TP    | d13Corg | d15Ntotal | d34Sbulk | TOC/TN  | TOC/TP  | DOP  |     |
|              |             |      |      |       |         |           |          | (molar) | (molar) |      |     |
| WC2          | 0           | 0.73 | 0.13 | 0.038 | -27.5   | 0.8       | -14.7    | 6.6     | 50      | 0.77 |     |
| WC3          | 2           | 4.06 | 0.18 | 0.023 | -28.6   | -0.3      | -16.6    | 25.9    | 448     | 0.85 | Ukw |
| WC4          | 4           | 4.28 | 0.18 | 0.02  | -28.1   | 0         | -21.5    | 27.3    | 542     | 0.82 | Ukw |
| WC5          | 6           | 5.16 | 0.22 | 0.021 | -28.4   | -0.4      | -23.7    | 28      | 626     | 0.84 | Ukw |
| WC6          | 8           | 4.99 | 0.2  | 0.023 | -28.6   | 0         | -21.8    | 28.7    | 568     | 0.88 | Ukw |
| WC7          | 10          | 4.38 | 0.19 | 0.021 | -28.2   | 0.1       | -7.2     | 27.1    | 544     | 0.89 | Ukw |
| WC8          | 11.5        | 0.44 | 0.13 | 0.064 | -26.9   | 0.9       | -30.2    | 3.8     | 18      | 0.68 |     |
